# Supplementary material for: Tuning of the freezing and melting points of [Hmim][NO3] by the addition of water and nitrate salts
Source: Royal Society of Chemistry journal article supplement (doi:10.1039/c4ra06290f), 2014-01-01
Supplement: c4ra06290f1.pdf [file c4ra06290f1.pdf]

S.1 Parameters relevant to commercial nitrate salts

| <i>Cation and charge</i> | <i>Atomic radius [pm]</i> | <i>Water of crystallization [n° molecules of water ]</i> | <i>Melting point [°C]</i> |
|--------------------------|---------------------------|----------------------------------------------------------|---------------------------|
| Ag <sup>+</sup>          | 160                       | 0                                                        | 212.0 <sup>1</sup>        |
| Al <sup>3+</sup>         | 125                       | 9                                                        | 73.0 <sup>1</sup>         |
| Ba <sup>2+</sup>         | 215                       | 0                                                        | 592.0 <sup>1</sup>        |
| Bi <sup>2+</sup>         | 160                       | 5                                                        | 30.0 <sup>1</sup>         |
| Ca <sup>2+</sup>         | 180                       | 4                                                        | 45.0 <sup>1</sup>         |
| Cd <sup>2+</sup>         | 155                       | 4                                                        | 59.5 <sup>1</sup>         |
| Ce <sup>3+</sup>         | 215                       | 6                                                        | 210.0 <sup>2</sup>        |
| Co <sup>2+</sup>         | 135                       | 6                                                        | 55.0 <sup>1</sup>         |
| Cr <sup>3+</sup>         | 140                       | 9                                                        | 60.0 <sup>1</sup>         |
| Cs <sup>+</sup>          | 260                       | 0                                                        | 414.0 <sup>1</sup>        |
| Cu <sup>2+</sup>         | 135                       | 3                                                        | 114.0 <sup>1</sup>        |
| Fe <sup>3+</sup>         | 140                       | 9                                                        | 47.0 <sup>1</sup>         |
| K <sup>+</sup>           | 220                       | 0                                                        | 334.0 <sup>1</sup>        |
| La <sup>3+</sup>         | 195                       | 6                                                        | 66.5 <sup>1</sup>         |
| Li <sup>+</sup>          | 145                       | 0                                                        | 264.0 <sup>1</sup>        |
| Mg <sup>2+</sup>         | 150                       | 6                                                        | 89.0 <sup>1</sup>         |
| Mn <sup>2+</sup>         | 140                       | 4                                                        | 37.0 <sup>1</sup>         |
| Na <sup>+</sup>          | 180                       | 0                                                        | 308.0 <sup>1</sup>        |
| Ni <sup>2+</sup>         | 135                       | 6                                                        | 56.0 <sup>1</sup>         |
| Pb <sup>2+</sup>         | 180                       | 0                                                        | 470.0 <sup>1</sup>        |
| Pd <sup>2+</sup>         | 180                       | 2                                                        | 300.0 <sup>1</sup>        |
| Sr <sup>2+</sup>         | 200                       | 0                                                        | 570.0 <sup>1</sup>        |
| Tl <sup>+</sup>          | 190                       | 0                                                        | 206.0 <sup>1</sup>        |
| Tl <sup>3+</sup>         | 190                       | 3                                                        | 103.5 <sup>1</sup>        |
| Zn <sup>2+</sup>         | 135                       | 6                                                        | 36.0 <sup>1</sup>         |

<sup>1</sup> Sigma-Aldrich database

<sup>2</sup> Carlo Erba database
